# Supplementary material
Source: PubMed Central journal article supplement (PMC7384563)
Supplement: 13423_2020_1767_MOESM1_ESM.pdf [file 13423_2020_1767_MOESM1_ESM.pdf]

## Supplemental Material

Table S1

*Stimuli: Urban Myths and General Knowledge Questions*

| Test Item                                                                                        | Answer |
|--------------------------------------------------------------------------------------------------|--------|
| You must wait 24 hours before filing a missing persons report with the police.                   | FALSE  |
| Gum remains in the stomach for 7 years before being fully digested.                              | FALSE  |
| Thomas Edison invented the lightbulb.                                                            | FALSE  |
| During the Salem Witch Trials, alleged witches were burned at the stake.                         | FALSE  |
| Eating before swimming increases the risk of cramps.                                             | FALSE  |
| Adding salt to a pot of water makes it boil faster.                                              | FALSE  |
| The Great Wall of China is visible from space.                                                   | FALSE  |
| Alcohol kills brain cells.                                                                       | FALSE  |
| Different parts of your tongue are specialized for different tastes (sweet, salty, bitter, etc.) | FALSE  |
| Humans only use approximately 10% of their brains.                                               | FALSE  |
| Most body heat is lost through the top of the head.                                              | FALSE  |
| Waking a sleepwalker is bad for their health.                                                    | FALSE  |
| Bananas grow on palm trees.                                                                      | FALSE  |
| Milk increases mucus.                                                                            | FALSE  |
| Bats use echolocation because they are blind.                                                    | FALSE  |
| Goldfish have a memory span of 3-seconds.                                                        | FALSE  |
| Shaving hair makes it grow back thicker and darker.                                              | FALSE  |
| Vikings wore horned helmets.                                                                     | FALSE  |
| Drinking alcohol warms up your body.                                                             | FALSE  |
| Bulls get aggressive when they see the color red.                                                | FALSE  |
| Hair and fingernails continue growing after death.                                               | FALSE  |
| Adding oil to pasta prevents it from sticking together.                                          | FALSE  |
| On average, a person swallows 8 spiders per year in their sleep.                                 | FALSE  |
| From base to peak, Everest is the tallest mountain in the world.                                 | FALSE  |
| When the Pilgrims arrived in America, they first landed at Plymouth Rock.                        | FALSE  |
| Historically, ninjas wore all-black uniforms.                                                    | FALSE  |
| Lightning never strikes the same place twice.                                                    | FALSE  |
| Meteors catch fire because of the friction from entering Earth's atmosphere.                     | FALSE  |
| A penny dropped from the top of a skyscraper could kill a person below.                          | FALSE  |
| The North Star is the brightest star in the sky.                                                 | FALSE  |
| Personalities are influenced by whether a person left-brain or right-brain dominant.             | FALSE  |
| Daddy long-legs spiders have deadly venom, but their fangs are too short to pierce human skin.   | FALSE  |
| De-oxygenated blood in your veins is blue.                                                       | FALSE  |
| Dogs see in black-and-white.                                                                     | FALSE  |
| Camels store water in their humps.                                                               | FALSE  |
| Cracking your knuckles increases the risk of arthritis.                                          | FALSE  |
| Dogs drool instead of sweating.                                                                  | FALSE  |

|                                                                                                     |       |
|-----------------------------------------------------------------------------------------------------|-------|
| Albert Einstein failed math in grade school.                                                        | FALSE |
| Caffeine dehydrates the body.                                                                       | FALSE |
| Coffee is made from beans.                                                                          | FALSE |
| Chameleons change color to match the object or surface they are touching.                           | FALSE |
| Sugar consumption is linked to hyperactivity in children.                                           | FALSE |
| Over time, radiation from microwave ovens can increase the risk of cancer.                          | FALSE |
| The capital of Australia is Sydney.                                                                 | FALSE |
| Wolves howl more when the full moon is visible.                                                     | FALSE |
| Outer space is a vacuum, entirely empty of matter.                                                  | FALSE |
| Touching toads can cause warts.                                                                     | FALSE |
| The Morse code distress signal "SOS" stands for "Save Our Ship".                                    | FALSE |
| Cell phones connect to satellites to make phone calls.                                              | FALSE |
| Caffeine stunts growth in children.                                                                 | FALSE |
| Penguins mate for life.                                                                             | FALSE |
| Touching a baby bird will cause the mother bird to reject it.                                       | FALSE |
| The fruit "orange" was named after the color "orange".                                              | FALSE |
| Napoleon Bonaparte was shorter than average.                                                        | FALSE |
| During the Middle Ages, few people lived past age 35.                                               | FALSE |
| The average lifespan of a housefly is 24 hours.                                                     | FALSE |
| Skin wrinkles underwater because water is absorbed into the pores.                                  | FALSE |
| Sunflowers turn to track the sun across the sky.                                                    | FALSE |
| There are more humans alive today than have ever lived in the history of Earth.                     | FALSE |
| Benjamin Franklin suggested that a wild turkey be the symbol of the USA.                            | FALSE |
| Fortune cookies were invented in China.                                                             | FALSE |
| A shot of espresso contains more caffeine than a cup of drip coffee.                                | FALSE |
| Bathroom door handles have high concentrations of bacteria.                                         | FALSE |
| Turkey makes you tired because the meat has higher levels of tryptophan than other meats.           | FALSE |
| In the Southern Hemisphere, toilets flush in the opposite direction because of the Coriolis effect. | FALSE |
| Distilled water is an excellent conductor of electricity.                                           | FALSE |
| Reading in low light hurts vision.                                                                  | FALSE |
| Glass is a slow-moving liquid.                                                                      | FALSE |
| Getting rust in a cut causes tetanus.                                                               | FALSE |
| Poinsettia flowers are poisonous.                                                                   | FALSE |
| Hot-air hand dryers are more sanitary than paper towels.                                            | FALSE |
| Sneezes travel at 100 miles per hour.                                                               | FALSE |
| Cockroaches can survive a nuclear blast.                                                            | FALSE |
| A duck's quack does not echo.                                                                       | FALSE |
| Quicksand causes victims to sink.                                                                   | FALSE |
| Coffee reduces the influence of alcohol.                                                            | FALSE |
| Breath mints and mouthwash prevent breathalyzers from detecting alcohol.                            | FALSE |
| Sharks do not suffer from cancer.                                                                   | FALSE |
| Antibiotics kill viruses, like the flu.                                                             | FALSE |
| Diamonds are formed when coal undergoes high pressure.                                              | FALSE |

|                                                                                            |      |
|--------------------------------------------------------------------------------------------|------|
| A Geiger Counter is used to detect radiation.                                              | TRUE |
| Spinach is high in iron.                                                                   | TRUE |
| The giraffe is the tallest mammal.                                                         | TRUE |
| The chemical formula for water is H <sub>2</sub> O.                                        | TRUE |
| The Harry Potter book series is the best-selling series of all time.                       | TRUE |
| Spiders have eight legs.                                                                   | TRUE |
| Celery is a negative-calorie food because it takes more energy to digest than it provides. | TRUE |
| Blue whales are mammals.                                                                   | TRUE |
| The cheetah can run faster than any other animal.                                          | TRUE |
| There are eight planets in the solar system.                                               | TRUE |
| The Declaration of Independence was signed in 1776.                                        | TRUE |
| On average, cats live longer than dogs.                                                    | TRUE |
| Mixing bleach and ammonia is dangerous.                                                    | TRUE |
| On hot days, it is possible to fry an egg on a sidewalk.                                   | TRUE |
| Humans can only survive 3-4 days without water.                                            | TRUE |
| The first President of the United States of America was George Washington.                 | TRUE |
| Sun exposure lightens hair color.                                                          | TRUE |
| Citrus fruits are high in Vitamin C.                                                       | TRUE |
| Washington, D.C. is the capital of the USA.                                                | TRUE |
| The USA was originally 13 British colonies.                                                | TRUE |
| Every state in the USA elects two Senators.                                                | TRUE |
| A marathon is a 26.2 mile run.                                                             | TRUE |
| Electrons are negatively-charged ions.                                                     | TRUE |
| Texas is larger in size than Hawaii.                                                       | TRUE |
| Most humans alive today have never made a phone call.                                      | TRUE |
| Adding Viagra to water makes flowers stand up straight.                                    | TRUE |
| The average cloud weighs over a million pounds.                                            | TRUE |
| The closest living relative to the dinosaur Tyrannosaurus Rex is the chicken.              | TRUE |
| Glass balls bounce higher than rubber balls.                                               | TRUE |
| Venus is the planet closest to Earth.                                                      | TRUE |
| Violins have four strings.                                                                 | TRUE |
| The Japanese national flag has a red circle in the center.                                 | TRUE |
| Elephant tusks are made of ivory.                                                          | TRUE |
| The human heart has four chambers.                                                         | TRUE |
| Sharks are fish, not mammals.                                                              | TRUE |
| Fingernails are made of keratin.                                                           | TRUE |
| The ozone layer in the atmosphere absorbs ultraviolet light from the sun.                  | TRUE |
| The kiwi bird cannot fly.                                                                  | TRUE |
| Caterpillars grow and develop into butterflies.                                            | TRUE |
| Giant Pandas eat bamboo.                                                                   | TRUE |
| If you are paying attention, select "True" and set your confidence rating at 70.           | TRUE |

Table S2a

Sample 1: Means, standard deviations, and Pearson Product-Moment correlations with confidence intervals

| Variable                     | <i>M</i> | <i>SD</i> | 1                     | 2                      | 3                      | 4                      | 5                   | 6                   |
|------------------------------|----------|-----------|-----------------------|------------------------|------------------------|------------------------|---------------------|---------------------|
| 1. Belief Updating           | 0.75     | 0.18      |                       |                        |                        |                        |                     |                     |
| 2. RWA                       | 2.35     | 0.87      | -.19*<br>[-.36, -.01] |                        |                        |                        |                     |                     |
| 3. AOT                       | 5.39     | 1.06      | .47**<br>[.32, .60]   | -.62**<br>[-.72, -.50] |                        |                        |                     |                     |
| 4. Conservatism              | 2.67     | 1.25      | -.07<br>[-.25, .11]   | .57**<br>[.44, .68]    | -.32**<br>[-.47, -.15] |                        |                     |                     |
| 5. Cognitive Reflection Test | 0.69     | 0.30      | .35**<br>[.19, .50]   | -.35**<br>[-.49, -.18] | .46**<br>[.31, .59]    | -.20*<br>[-.36, -.02]  |                     |                     |
| 6. Intellectual Humility     | 4.13     | 0.62      | .09<br>[-.09, .26]    | -.48**<br>[-.61, -.34] | .52**<br>[.37, .64]    | -.31**<br>[-.46, -.14] | .17<br>[-.01, .33]  |                     |
| 7. Age                       | 37.95    | 12.83     | .37**<br>[.21, .51]   | -.05<br>[-.22, .13]    | .25**<br>[.07, .41]    | -.02<br>[-.20, .16]    | .32**<br>[.15, .47] | -.05<br>[-.23, .13] |

Note. *M* and *SD* are used to represent mean and standard deviation, respectively. Values in square brackets indicate the 95% confidence interval for each correlation. \* indicates  $p < .05$ . \*\* indicates  $p < .01$ .

Table S2b

*Sample 2: Means, standard deviations, and Pearson Product-Moment correlations with confidence intervals*

| Variable           | <i>M</i> | <i>SD</i> | 1                      | 2                      | 3                   | 4                  | 5                  |
|--------------------|----------|-----------|------------------------|------------------------|---------------------|--------------------|--------------------|
| 1. Belief Updating | 0.73     | 0.20      |                        |                        |                     |                    |                    |
| 2. AOT             | 4.41     | 0.83      | .23**<br>[.07, .37]    |                        |                     |                    |                    |
| 3. RWA             | 2.34     | 0.83      | -.32**<br>[-.45, -.17] | -.34**<br>[-.47, -.19] |                     |                    |                    |
| 4. SDO             | 1.76     | 1.81      | -.01<br>[-.17, .15]    | -.45**<br>[-.57, -.32] | .10<br>[-.06, .26]  |                    |                    |
| 5. Conservatism    | 2.64     | 1.15      | -.06<br>[-.22, .10]    | -.08<br>[-.24, .07]    | .60**<br>[.49, .69] | .03<br>[-.13, .18] |                    |
| 6. Age             | 38.27    | 11.71     | .23**<br>[.08, .37]    | .01<br>[-.15, .17]     | -.08<br>[-.24, .07] | .02<br>[-.13, .18] | .11<br>[-.05, .26] |

*Note.* *M* and *SD* are used to represent mean and standard deviation, respectively. Values in square brackets indicate the 95% confidence interval for each correlation. \* indicates  $p < .05$ . \*\* indicates  $p < .01$ .

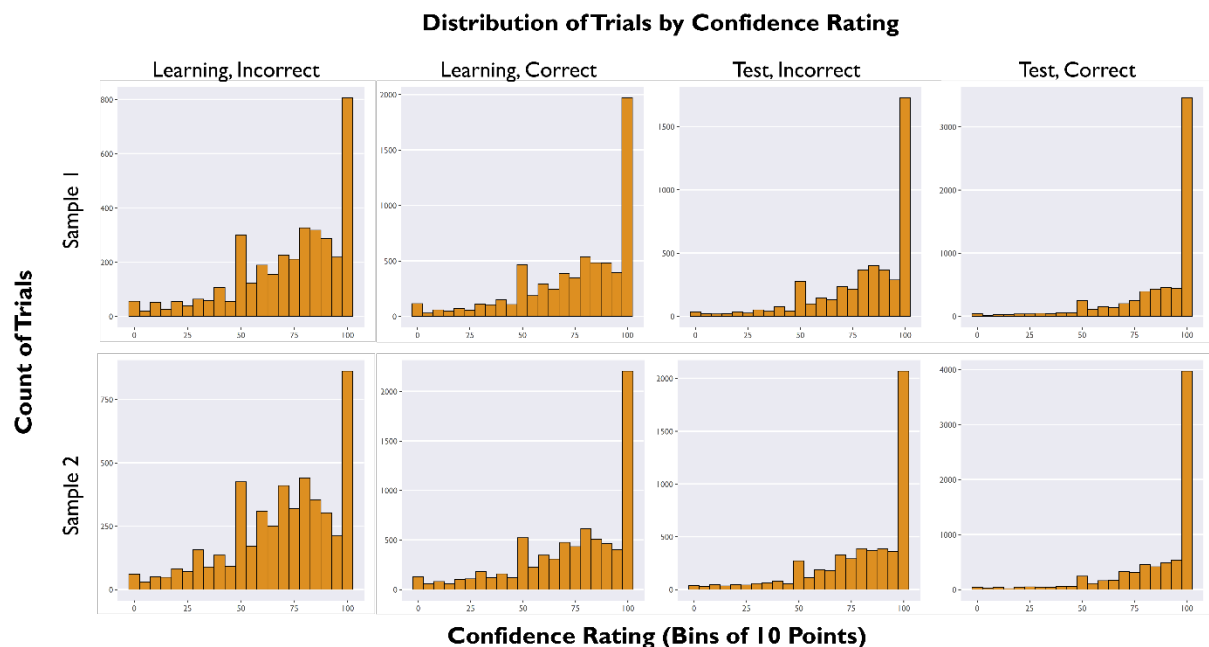

*Figure S1.* Histograms depicting the distribution of incorrect trials by confidence rating during the feedback learning task (i.e., prediction error on incorrect trials). Distributions are separated by sample (1 or 2), session (learning or test), and baseline accuracy (correct or incorrect). Overall, the stimulus set successfully probed commonly held erroneous beliefs. As intended, the majority of the stimulus items were endorsed with very high confidence.

**Gender Differences.** We did not find any gender differences for our main variables of interest.

Men and women did not significantly differ on average RWA scores (Sample 1:  $t(126) = -1.20$ ,  $p = 0.232$ ; Sample 2:  $t(152) = 0.10$ ,  $p = .923$ ) or AOT scores (Sample 1:  $t(126) = 0.75$ ,  $p = .457$ ; Sample 2:  $t(152) = -1.48$ ,  $p = .142$ ). Average belief updating scores also did not differ between men and women (Sample 1:  $t(126) = 1.05$ ,  $p = .297$ ; Sample 2:  $t(152) = 0.57$ ,  $p = .572$ ).

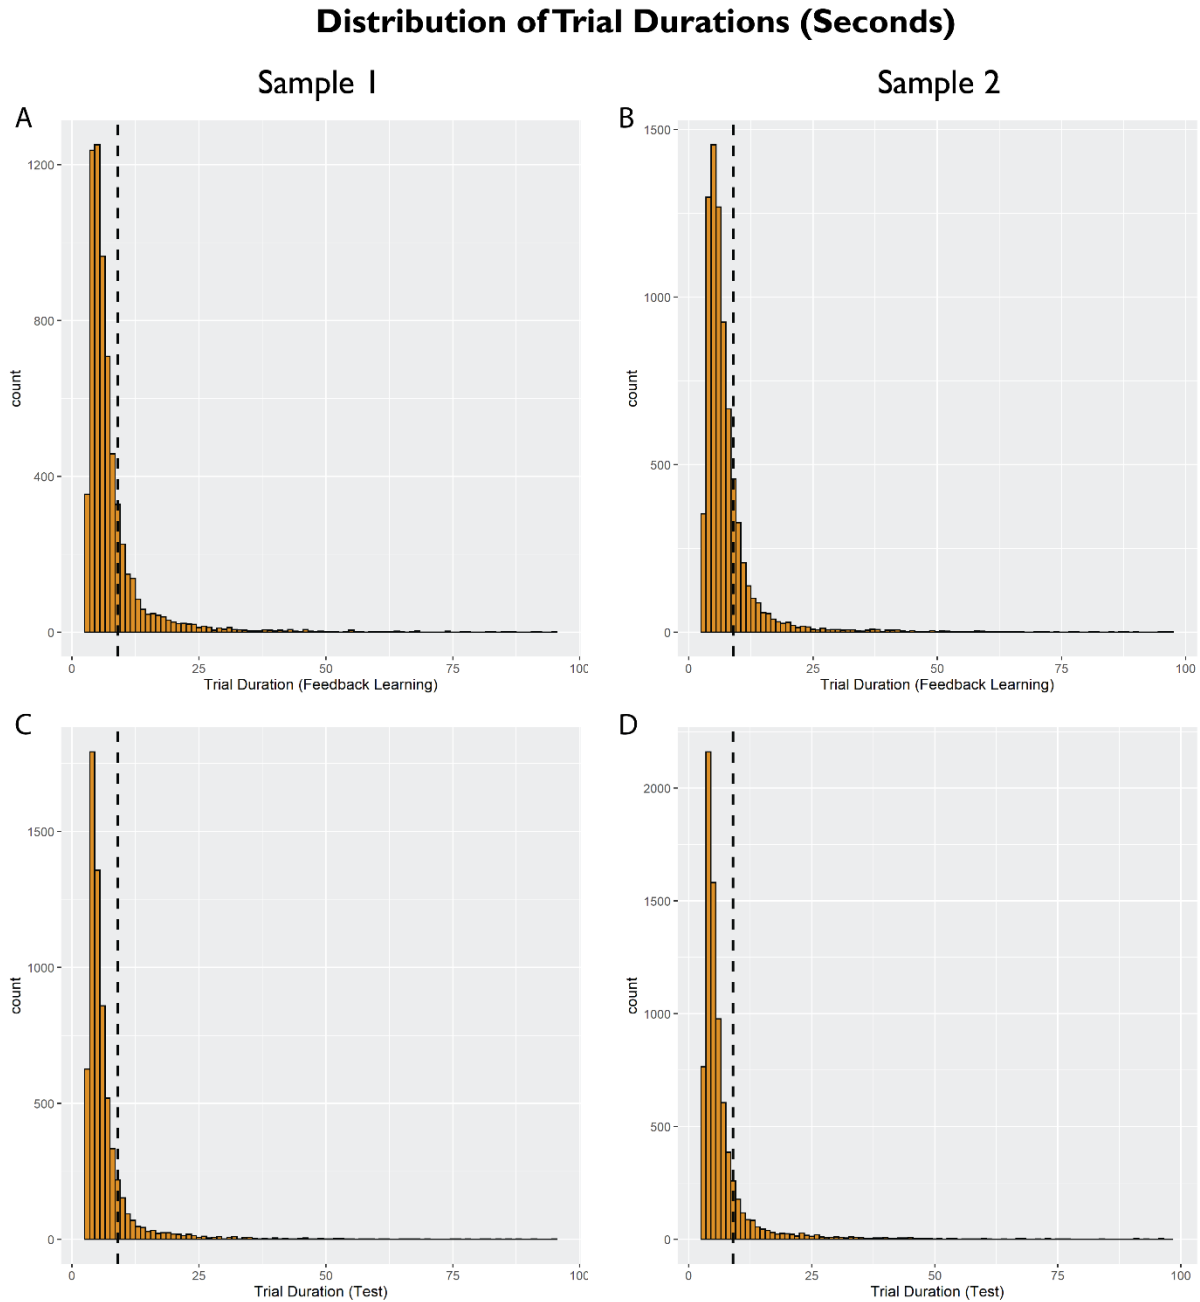

*Figure S2.* Histograms of trial durations, subset by session and sample. Dotted black line denotes the 80<sup>th</sup> percentile cutoff (9 seconds) applied to exclude slow trials that may reflect inattention or cheating. A) Sample 1, feedback learning phase. B) Sample 2, feedback learning phase. C) Sample 1, test phase. D) Sample 2, test phase.

Table S3

*Logistic Regression Estimates for the Effect of RWA on Belief Updating  
Prediction Error Binned to Equate Number of Observations Per-Bin*

| <b>Belief Updating: Session 1</b> |                    |           |              |                |
|-----------------------------------|--------------------|-----------|--------------|----------------|
| <i>Predictors</i>                 | <i>Odds Ratios</i> | <i>SE</i> | <i>CI</i>    | <i>p</i>       |
| (Intercept)                       | 6.81 ***           | 0.17      | 4.83 – 9.59  | < <b>0.001</b> |
| RWA                               | 0.73 *             | 0.13      | 0.57 – 0.93  | <b>0.012</b>   |
| Prediction Error                  | 1.07 ~             | 0.03      | 1.00 – 1.14  | 0.055          |
| Session                           | 0.25 ***           | 0.12      | 0.20 – 0.32  | < <b>0.001</b> |
| RWA * Prediction Error            | 0.99               | 0.04      | 0.92 – 1.06  | 0.815          |
| RWA * Prediction Error * Session  | 1.07 *             | 0.03      | 1.00 – 1.13  | <b>0.039</b>   |
| Observations                      | 4368               |           |              |                |
| Marginal R <sup>2</sup>           | 0.142              |           |              |                |
| <b>Belief Updating: Session 2</b> |                    |           |              |                |
| <i>Predictors</i>                 | <i>Odds Ratios</i> | <i>SE</i> | <i>CI</i>    | <i>p</i>       |
| (Intercept)                       | 10.00 ***          | 0.19      | 6.85 – 14.59 | < <b>0.001</b> |
| RWA                               | 0.56 ***           | 0.15      | 0.42 – 0.75  | < <b>0.001</b> |
| Prediction Error                  | 0.93 ~             | 0.04      | 0.86 – 1.00  | 0.067          |
| Session                           | 0.24 ***           | 0.13      | 0.19 – 0.31  | < <b>0.001</b> |
| RWA * Prediction Error            | 1.00               | 0.04      | 0.93 – 1.09  | 0.934          |
| RWA * Prediction Error * Session  | 1.09 *             | 0.03      | 1.02 – 1.16  | <b>0.012</b>   |
| Observations                      | 4867               |           |              |                |
| Marginal R <sup>2</sup>           | 0.125              |           |              |                |

\*  $p < 0.05$    \*\*  $p < 0.01$    \*\*\*  $p < 0.001$

*Note.* These models use an alternate binning scheme for the prediction error variable. Number of observations per bin is equated, but not the range of confidence ratings. Range of prediction error values for each bin are as follows: 1 = [0,50], 2 = (50,68], 3 = (68,82], 4 = (82,96], 5 = (96,100].



Table S4

*Logistic Regression Estimates for the Effect of AOT on Belief Updating  
Prediction Error Binned to Equate Number of Observations Per-Bin*

| <b>Belief Updating: Sample 1</b> |                    |           |              |          |
|----------------------------------|--------------------|-----------|--------------|----------|
| <i>Predictors</i>                | <i>Odds Ratios</i> | <i>SE</i> | <i>CI</i>    | <i>p</i> |
| (Intercept)                      | 6.59 ***           | 0.17      | 4.73 – 9.18  | <0.001   |
| AOT                              | 1.64 ***           | 0.13      | 1.28 – 2.12  | <0.001   |
| Prediction Error                 | 1.08 *             | 0.04      | 1.01 – 1.16  | 0.035    |
| Session                          | 0.25 ***           | 0.12      | 0.20 – 0.32  | <0.001   |
| AOT * Prediction Error           | 1.07 ~             | 0.04      | 1.00 – 1.15  | 0.052    |
| AOT * Prediction Error * Session | 0.89 ***           | 0.03      | 0.84 – 0.94  | <0.001   |
| Observations                     | 4368               |           |              |          |
| Marginal R <sup>2</sup>          | 0.191              |           |              |          |
| <b>Belief Updating: Sample 2</b> |                    |           |              |          |
| <i>Predictors</i>                | <i>Odds Ratios</i> | <i>SE</i> | <i>CI</i>    | <i>p</i> |
| (Intercept)                      | 10.50 ***          | 0.19      | 7.17 – 15.38 | <0.001   |
| AOT                              | 1.71 ***           | 0.15      | 1.27 – 2.30  | <0.001   |
| Prediction Error                 | 0.91 *             | 0.04      | 0.84 – 0.98  | 0.017    |
| Session                          | 0.25 ***           | 0.13      | 0.19 – 0.32  | <0.001   |
| AOT * Prediction Error           | 0.94               | 0.04      | 0.87 – 1.02  | 0.141    |
| AOT * Prediction Error * Session | 0.99               | 0.03      | 0.93 – 1.06  | 0.775    |
| Observations                     | 4867               |           |              |          |
| Marginal R <sup>2</sup>          | 0.107              |           |              |          |

\*  $p < 0.05$    \*\*  $p < 0.01$    \*\*\*  $p < 0.001$

*Note.* These models use an alternate binning scheme for the prediction error variable. Number of observations per bin is equated, but not the range of confidence ratings. Range of prediction error values for each bin are as follows: 1 = [0,50], 2 = (50,68], 3 = (68,82], 4 = (82,96], 5 = (96,100].

Table S5

*Logistic Regression Estimates for the Effect of Conservatism on Belief Updating*

| <b>Belief Updating: Sample 1</b>           |                    |           |              |          |
|--------------------------------------------|--------------------|-----------|--------------|----------|
| <i>Predictors</i>                          | <i>Odds Ratios</i> | <i>SE</i> | <i>CI</i>    | <i>p</i> |
| (Intercept)                                | 7.90 ***           | 0.23      | 5.04 – 12.39 | <0.001   |
| Conservatism                               | 0.78               | 0.19      | 0.54 – 1.13  | 0.187    |
| Prediction Error                           | 1.01               | 0.04      | 0.93 – 1.10  | 0.784    |
| Session                                    | 0.25 ***           | 0.12      | 0.20 – 0.32  | <0.001   |
| Conservatism * Prediction Error            | 1.03               | 0.04      | 0.95 – 1.12  | 0.493    |
| Conservatism * Prediction Error * Session  | 1.03               | 0.03      | 0.98 – 1.08  | 0.292    |
| Observations                               | 4368               |           |              |          |
| Marginal R <sup>2</sup>                    | 0.095              |           |              |          |
| * $p < 0.05$ ** $p < 0.01$ *** $p < 0.001$ |                    |           |              |          |
| <b>Belief Updating: Sample 2</b>           |                    |           |              |          |
| <i>Predictors</i>                          | <i>Odds Ratios</i> | <i>SE</i> | <i>CI</i>    | <i>p</i> |
| (Intercept)                                | 11.38 ***          | 0.24      | 7.11 – 18.21 | <0.001   |
| Conservatism                               | 1.09               | 0.20      | 0.73 – 1.63  | 0.673    |
| Prediction Error                           | 0.92               | 0.05      | 0.83 – 1.00  | 0.063    |
| Session                                    | 0.25 ***           | 0.13      | 0.19 – 0.32  | <0.001   |
| Conservatism * Prediction Error            | 0.94               | 0.05      | 0.85 – 1.03  | 0.172    |
| Conservatism * Prediction Error * Session  | 1.04               | 0.03      | 0.98 – 1.10  | 0.165    |
| Observations                               | 4867               |           |              |          |
| Marginal R <sup>2</sup>                    | 0.087              |           |              |          |
| * $p < 0.05$ ** $p < 0.01$ *** $p < 0.001$ |                    |           |              |          |

*Note.* Conservatism was calculated as the average of two questions that asked participants to rate self-reported social and economic conservatism on a 5-point Likert scale (*very liberal ... very conservative*).

Table S6

*Logistic Regression Estimates for the Effects of SDO on Belief Updating*

| <i>Predictors</i>                | <b>Belief Updating (Sample 2)</b> |           |              |          |
|----------------------------------|-----------------------------------|-----------|--------------|----------|
|                                  | <i>Odds Ratios</i>                | <i>SE</i> | <i>CI</i>    | <i>p</i> |
| (Intercept)                      | 11.04 ***                         | 0.24      | 6.96 – 17.50 | <0.001   |
| SDO                              | 0.86                              | 0.19      | 0.59 – 1.26  | 0.436    |
| Prediction Error                 | 0.92                              | 0.05      | 0.84 – 1.01  | 0.079    |
| Session                          | 0.25 ***                          | 0.13      | 0.19 – 0.32  | <0.001   |
| SDO * Prediction Error           | 1.04                              | 0.05      | 0.95 – 1.14  | 0.438    |
| SDO * Prediction Error * Session | 0.99                              | 0.03      | 0.93 – 1.06  | 0.745    |
| Observations                     | 4867                              |           |              |          |
| Marginal R <sup>2</sup>          | 0.084                             |           |              |          |

\*  $p < 0.05$    \*\*  $p < 0.01$    \*\*\*  $p < 0.001$
